# Supplementary material
Source: MDPI journal article supplement (https://www.mdpi.com/2073-445X/11/5/748)
Supplement: s1 [file s1]

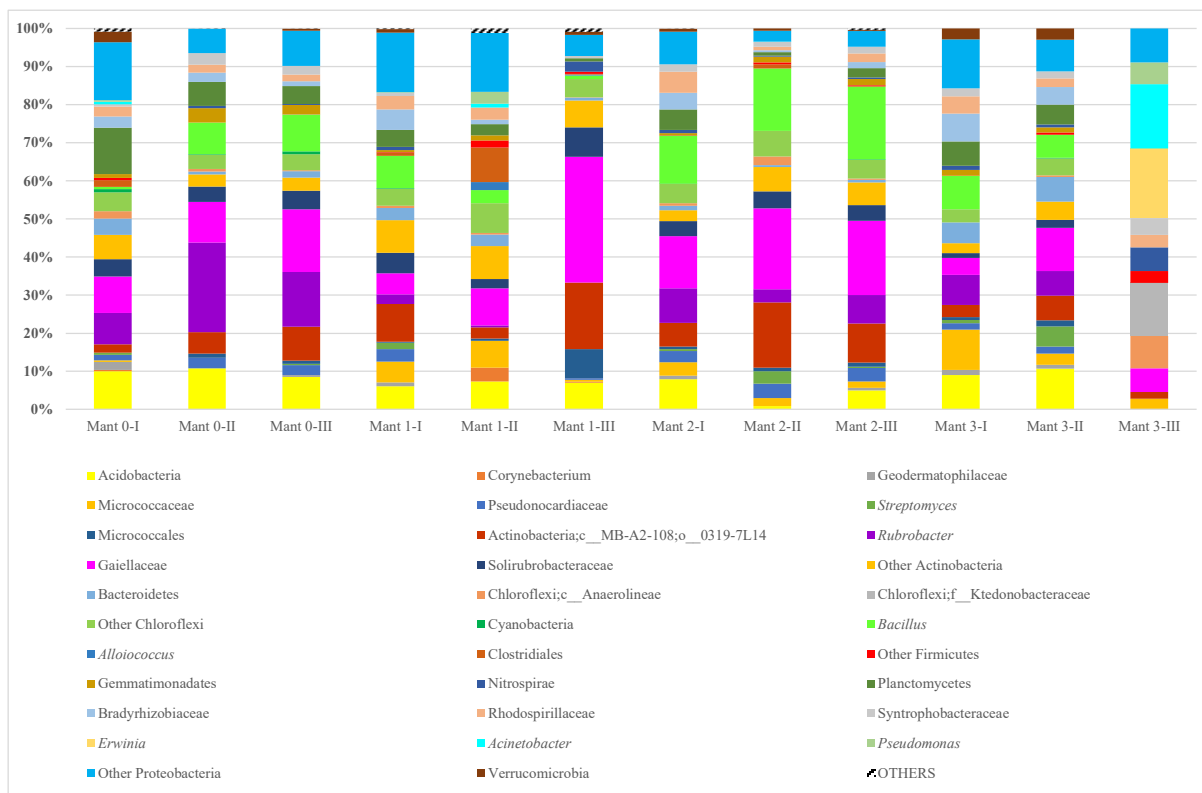

**Figure S1.** Relative abundances (%) of bacteria identified by MiSeq Illumina in soil samples. Abbreviations are as follow: Soil samples: Mant 0, control soil (original Vertisol not affected by pedotechnics), while Mant 1, Mant 2 and Mant 3 represent the anthropogenic soils of sites 1 to 3. Depths: I, 0-10 cm; II, 10-30 cm; and III, 30-50 cm.
